# Supplementary material
Source: Springer Nature journal article supplement (https://www.springermedizin.de/resource/supplementary/13063_2014_2247_MOESM1_ESM.pdf/9621732)
Supplement: MOESM1 [file 9621732]

# The challenges of long term follow-up data collection in academically-led breast cancer clinical trials: The UK perspective

Lucy S Kilburn, Jane Banerji and Judith M Bliss on behalf of the NCRI Breast Clinical Studies Group

## Supplementary material

Figure A1 – Protocol and CRF review data extraction proforma

|                                                                                              |                                       |                                            |                                                                                                                                                                |
|----------------------------------------------------------------------------------------------|---------------------------------------|--------------------------------------------|----------------------------------------------------------------------------------------------------------------------------------------------------------------|
| Name of trial                                                                                | <input type="text"/>                  | Trial contact                              | <input type="text"/>                                                                                                                                           |
| Type of trial:                                                                               | Chemotherapy <input type="checkbox"/> | Endocrine therapy <input type="checkbox"/> | Radiotherapy <input type="checkbox"/> Other <input type="checkbox"/>                                                                                           |
| Protocol received                                                                            | <input type="checkbox"/>              | Protocol date                              | <input type="text"/> <input type="text"/> <input type="text"/> <input type="text"/> <input type="text"/> <input type="text"/><br><small>Day Month Year</small> |
| CRFs received                                                                                | <input type="checkbox"/>              | CRF date                                   | <input type="text"/> <input type="text"/> <input type="text"/> <input type="text"/> <input type="text"/> <input type="text"/><br><small>Day Month Year</small> |
| <b>Patient information collected at baseline/randomisation:</b>                              |                                       |                                            |                                                                                                                                                                |
| Patient name                                                                                 | Yes <input type="checkbox"/>          | No <input type="checkbox"/>                |                                                                                                                                                                |
| Date of birth                                                                                | Yes <input type="checkbox"/>          | No <input type="checkbox"/>                |                                                                                                                                                                |
| Hospital number                                                                              | Yes <input type="checkbox"/>          | No <input type="checkbox"/>                |                                                                                                                                                                |
| NHS number                                                                                   | Yes <input type="checkbox"/>          | No <input type="checkbox"/>                |                                                                                                                                                                |
| Histology number<br><i>(if appropriate)</i>                                                  | Yes <input type="checkbox"/>          | No <input type="checkbox"/>                |                                                                                                                                                                |
| Location of biological sample<br><i>(if appropriate)</i>                                     | Yes <input type="checkbox"/>          | No <input type="checkbox"/>                |                                                                                                                                                                |
| <b>Follow up:</b>                                                                            |                                       |                                            |                                                                                                                                                                |
| When does follow-up start in trial?                                                          | <input type="text"/>                  |                                            |                                                                                                                                                                |
| When does follow-up finish in trial?                                                         | <input type="text"/>                  |                                            |                                                                                                                                                                |
| Which forms are filled in during follow-up, by whom and how often?                           |                                       |                                            |                                                                                                                                                                |
| <input type="text"/>                                                                         |                                       |                                            |                                                                                                                                                                |
| What examinations/investigations have to be done during follow-up according to the protocol? |                                       |                                            |                                                                                                                                                                |
| <input type="text"/>                                                                         |                                       |                                            |                                                                                                                                                                |
| Are in-patient stays recorded?                                                               | Yes <input type="checkbox"/>          | No <input type="checkbox"/>                |                                                                                                                                                                |
| Is there a deviation form?                                                                   | Yes <input type="checkbox"/>          | No <input type="checkbox"/>                | Is there a transfer form? Yes <input type="checkbox"/> No <input type="checkbox"/>                                                                             |
| Comments:                                                                                    |                                       |                                            |                                                                                                                                                                |
| <input type="text"/>                                                                         |                                       |                                            |                                                                                                                                                                |
| Primary endpoint?                                                                            | <input type="text"/>                  | Other recurrence-related endpoints?        | Yes <input type="checkbox"/> No <input type="checkbox"/>                                                                                                       |
| Definitions of any recurrence related endpoints according to the protocol                    |                                       |                                            |                                                                                                                                                                |
| <input type="text"/>                                                                         |                                       |                                            |                                                                                                                                                                |

|                                                         |                    |
|---------------------------------------------------------|--------------------|
| Name of trial <input style="width: 100%;" type="text"/> | EFFICACY QUESTIONS |
|---------------------------------------------------------|--------------------|

|                                                                                                |                                                          |
|------------------------------------------------------------------------------------------------|----------------------------------------------------------|
| Is efficacy measured?                                                                          | Yes <input type="checkbox"/> No <input type="checkbox"/> |
| Is alive/dead status recorded?                                                                 | Yes <input type="checkbox"/> No <input type="checkbox"/> |
| If dead, date of death requested?                                                              | Yes <input type="checkbox"/> No <input type="checkbox"/> |
| Patient seen date/phone contact date recorded?                                                 | Yes <input type="checkbox"/> No <input type="checkbox"/> |
| Should the person be followed up in person only, by phone only or can be either?               |                                                          |
| Person <input type="checkbox"/> Phone <input type="checkbox"/> Either <input type="checkbox"/> | <input style="width: 100%;" type="text"/>                |

|                                       |                                                          |                                    |                                   |                               |
|---------------------------------------|----------------------------------------------------------|------------------------------------|-----------------------------------|-------------------------------|
| Recurrence of breast cancer recorded? | Yes <input type="checkbox"/> No <input type="checkbox"/> | Free text <input type="checkbox"/> | Tick box <input type="checkbox"/> | Both <input type="checkbox"/> |
| New cancer recorded?                  | Yes <input type="checkbox"/> No <input type="checkbox"/> | Free text <input type="checkbox"/> | Tick box <input type="checkbox"/> | Both <input type="checkbox"/> |

|                                                  |                                                          |                                              |
|--------------------------------------------------|----------------------------------------------------------|----------------------------------------------|
| Menstrual status recorded?                       | Yes <input type="checkbox"/> No <input type="checkbox"/> | How many questions? <input type="checkbox"/> |
| Endocrine therapy use recorded?                  | Yes <input type="checkbox"/> No <input type="checkbox"/> | How many questions? <input type="checkbox"/> |
| Concomitant medications post treatment recorded? | Yes <input type="checkbox"/> No <input type="checkbox"/> | How many questions? <input type="checkbox"/> |
| QL questions/scoring required?                   | Yes <input type="checkbox"/> No <input type="checkbox"/> |                                              |

|          |
|----------|
| Comments |
|----------|

Name of trial

TOXICITY QUESTIONS

Is toxicity measured?

Yes  No

Is there CTC grading via tick boxes?

Yes  No

Are the following toxicities recorded?

Cardiac events Yes  No

Myalgia/  
arthralgia Yes  No

Neurotoxicity Yes  No

Fatigue Yes  No

Hand/foot  
syndrome Yes  No

Bone fractures Yes  No

Hot flushes Yes  No

Other (free text) Yes  No

Radiotherapy trials only:

How many side effects are to be assessed?

Is performance status recorded? Yes  No

Is weight recorded? Yes  No

Any investigations required? Yes  No  Specify

Any gynaecological procedures done? Yes  No

Comments

Name of trial  Trial for registration purposes? Yes  No

Sponsor(s)  Funder(s)

**Follow-up:**

Will tracing services be used to collect follow-up? Yes  No

If "Yes", specify

| Visit schedule* | Follow-up form requested? | Who can complete the form?                                                                                                                       | Investigations to be conducted at visit                                                                                                                                                                                                                                                                |
|-----------------|---------------------------|--------------------------------------------------------------------------------------------------------------------------------------------------|--------------------------------------------------------------------------------------------------------------------------------------------------------------------------------------------------------------------------------------------------------------------------------------------------------|
| 3m              |                           | Appropriate site personnel <input type="checkbox"/> GP <input type="checkbox"/><br>Other (specify) <input type="checkbox"/> <input type="text"/> | Blood <input type="checkbox"/> ECG <input type="checkbox"/> MUGA/ECHO <input type="checkbox"/> DEXA <input type="checkbox"/> Physical <input type="checkbox"/><br>Photos <input type="checkbox"/> Height/weight <input type="checkbox"/> Other (specify) <input type="checkbox"/> <input type="text"/> |
| 6m              |                           | Appropriate site personnel <input type="checkbox"/> GP <input type="checkbox"/><br>Other (specify) <input type="checkbox"/> <input type="text"/> | Blood <input type="checkbox"/> ECG <input type="checkbox"/> MUGA/ECHO <input type="checkbox"/> DEXA <input type="checkbox"/> Physical <input type="checkbox"/><br>Photos <input type="checkbox"/> Height/weight <input type="checkbox"/> Other (specify) <input type="checkbox"/> <input type="text"/> |
| 9m              |                           | Appropriate site personnel <input type="checkbox"/> GP <input type="checkbox"/><br>Other (specify) <input type="checkbox"/> <input type="text"/> | Blood <input type="checkbox"/> ECG <input type="checkbox"/> MUGA/ECHO <input type="checkbox"/> DEXA <input type="checkbox"/> Physical <input type="checkbox"/><br>Photos <input type="checkbox"/> Height/weight <input type="checkbox"/> Other (specify) <input type="checkbox"/> <input type="text"/> |
| 12m             |                           | Appropriate site personnel <input type="checkbox"/> GP <input type="checkbox"/><br>Other (specify) <input type="checkbox"/> <input type="text"/> | Blood <input type="checkbox"/> ECG <input type="checkbox"/> MUGA/ECHO <input type="checkbox"/> DEXA <input type="checkbox"/> Physical <input type="checkbox"/><br>Photos <input type="checkbox"/> Height/weight <input type="checkbox"/> Other (specify) <input type="checkbox"/> <input type="text"/> |
| 15m             |                           | Appropriate site personnel <input type="checkbox"/> GP <input type="checkbox"/><br>Other (specify) <input type="checkbox"/> <input type="text"/> | Blood <input type="checkbox"/> ECG <input type="checkbox"/> MUGA/ECHO <input type="checkbox"/> DEXA <input type="checkbox"/> Physical <input type="checkbox"/><br>Photos <input type="checkbox"/> Height/weight <input type="checkbox"/> Other (specify) <input type="checkbox"/> <input type="text"/> |
| 18m             |                           | Appropriate site personnel <input type="checkbox"/> GP <input type="checkbox"/><br>Other (specify) <input type="checkbox"/> <input type="text"/> | Blood <input type="checkbox"/> ECG <input type="checkbox"/> MUGA/ECHO <input type="checkbox"/> DEXA <input type="checkbox"/> Physical <input type="checkbox"/><br>Photos <input type="checkbox"/> Height/weight <input type="checkbox"/> Other (specify) <input type="checkbox"/> <input type="text"/> |
| 24m             |                           | Appropriate site personnel <input type="checkbox"/> GP <input type="checkbox"/><br>Other (specify) <input type="checkbox"/> <input type="text"/> | Blood <input type="checkbox"/> ECG <input type="checkbox"/> MUGA/ECHO <input type="checkbox"/> DEXA <input type="checkbox"/> Physical <input type="checkbox"/><br>Photos <input type="checkbox"/> Height/weight <input type="checkbox"/> Other (specify) <input type="checkbox"/> <input type="text"/> |
| 30m             |                           | Appropriate site personnel <input type="checkbox"/> GP <input type="checkbox"/><br>Other (specify) <input type="checkbox"/> <input type="text"/> | Blood <input type="checkbox"/> ECG <input type="checkbox"/> MUGA/ECHO <input type="checkbox"/> DEXA <input type="checkbox"/> Physical <input type="checkbox"/><br>Photos <input type="checkbox"/> Height/weight <input type="checkbox"/> Other (specify) <input type="checkbox"/> <input type="text"/> |
| 36m             |                           | Appropriate site personnel <input type="checkbox"/> GP <input type="checkbox"/><br>Other (specify) <input type="checkbox"/> <input type="text"/> | Blood <input type="checkbox"/> ECG <input type="checkbox"/> MUGA/ECHO <input type="checkbox"/> DEXA <input type="checkbox"/> Physical <input type="checkbox"/><br>Photos <input type="checkbox"/> Height/weight <input type="checkbox"/> Other (specify) <input type="checkbox"/> <input type="text"/> |
| 42m             |                           | Appropriate site personnel <input type="checkbox"/> GP <input type="checkbox"/><br>Other (specify) <input type="checkbox"/> <input type="text"/> | Blood <input type="checkbox"/> ECG <input type="checkbox"/> MUGA/ECHO <input type="checkbox"/> DEXA <input type="checkbox"/> Physical <input type="checkbox"/><br>Photos <input type="checkbox"/> Height/weight <input type="checkbox"/> Other (specify) <input type="checkbox"/> <input type="text"/> |
| 48m             |                           | Appropriate site personnel <input type="checkbox"/> GP <input type="checkbox"/><br>Other (specify) <input type="checkbox"/> <input type="text"/> | Blood <input type="checkbox"/> ECG <input type="checkbox"/> MUGA/ECHO <input type="checkbox"/> DEXA <input type="checkbox"/> Physical <input type="checkbox"/><br>Photos <input type="checkbox"/> Height/weight <input type="checkbox"/> Other (specify) <input type="checkbox"/> <input type="text"/> |
| 60m             |                           | Appropriate site personnel <input type="checkbox"/> GP <input type="checkbox"/><br>Other (specify) <input type="checkbox"/> <input type="text"/> | Blood <input type="checkbox"/> ECG <input type="checkbox"/> MUGA/ECHO <input type="checkbox"/> DEXA <input type="checkbox"/> Physical <input type="checkbox"/><br>Photos <input type="checkbox"/> Height/weight <input type="checkbox"/> Other (specify) <input type="checkbox"/> <input type="text"/> |
| 72m             |                           | Appropriate site personnel <input type="checkbox"/> GP <input type="checkbox"/><br>Other (specify) <input type="checkbox"/> <input type="text"/> | Blood <input type="checkbox"/> ECG <input type="checkbox"/> MUGA/ECHO <input type="checkbox"/> DEXA <input type="checkbox"/> Physical <input type="checkbox"/><br>Photos <input type="checkbox"/> Height/weight <input type="checkbox"/> Other (specify) <input type="checkbox"/> <input type="text"/> |
| 84m             |                           | Appropriate site personnel <input type="checkbox"/> GP <input type="checkbox"/><br>Other (specify) <input type="checkbox"/> <input type="text"/> | Blood <input type="checkbox"/> ECG <input type="checkbox"/> MUGA/ECHO <input type="checkbox"/> DEXA <input type="checkbox"/> Physical <input type="checkbox"/><br>Photos <input type="checkbox"/> Height/weight <input type="checkbox"/> Other (specify) <input type="checkbox"/> <input type="text"/> |
| 96m             |                           | Appropriate site personnel <input type="checkbox"/> GP <input type="checkbox"/><br>Other (specify) <input type="checkbox"/> <input type="text"/> | Blood <input type="checkbox"/> ECG <input type="checkbox"/> MUGA/ECHO <input type="checkbox"/> DEXA <input type="checkbox"/> Physical <input type="checkbox"/><br>Photos <input type="checkbox"/> Height/weight <input type="checkbox"/> Other (specify) <input type="checkbox"/> <input type="text"/> |
| 108m            |                           | Appropriate site personnel <input type="checkbox"/> GP <input type="checkbox"/><br>Other (specify) <input type="checkbox"/> <input type="text"/> | Blood <input type="checkbox"/> ECG <input type="checkbox"/> MUGA/ECHO <input type="checkbox"/> DEXA <input type="checkbox"/> Physical <input type="checkbox"/><br>Photos <input type="checkbox"/> Height/weight <input type="checkbox"/> Other (specify) <input type="checkbox"/> <input type="text"/> |
| 120m            |                           | Appropriate site personnel <input type="checkbox"/> GP <input type="checkbox"/><br>Other (specify) <input type="checkbox"/> <input type="text"/> | Blood <input type="checkbox"/> ECG <input type="checkbox"/> MUGA/ECHO <input type="checkbox"/> DEXA <input type="checkbox"/> Physical <input type="checkbox"/><br>Photos <input type="checkbox"/> Height/weight <input type="checkbox"/> Other (specify) <input type="checkbox"/> <input type="text"/> |
| Other=          |                           | Appropriate site personnel <input type="checkbox"/> GP <input type="checkbox"/><br>Other (specify) <input type="checkbox"/> <input type="text"/> | Blood <input type="checkbox"/> ECG <input type="checkbox"/> MUGA/ECHO <input type="checkbox"/> DEXA <input type="checkbox"/> Physical <input type="checkbox"/><br>Photos <input type="checkbox"/> Height/weight <input type="checkbox"/> Other (specify) <input type="checkbox"/> <input type="text"/> |

\* time from protocol treatment completion or other (state) \_\_\_\_\_

Name of trial

**Patient information collected at baseline/randomisation:**  
Gender Yes  No  Ethnicity Yes  No

**Mammography:**  
How often is mammography follow-up requested?  
*(tick all that apply, e.g. if annual or bi-annual allowed then tick both)*  
Not requested  Yearly  2-yearly  3-yearly

Is the pathology of new primary cancer/contralateral breast cancer collected (if resected)? Yes  No

Are any treatments for relapse/2<sup>nd</sup> primary collected? Yes  No   
Is it via free text or tick box? Free text  Tick box  Both

**Radiotherapy trials only:**  
Is information on the following toxicities/symptoms specifically requested (e.g. via tick box)?

|                   |                              |                             |               |                              |                             |
|-------------------|------------------------------|-----------------------------|---------------|------------------------------|-----------------------------|
| Breast shrinkage  | Yes <input type="checkbox"/> | No <input type="checkbox"/> | Lung fibrosis | Yes <input type="checkbox"/> | No <input type="checkbox"/> |
| Breast induration | Yes <input type="checkbox"/> | No <input type="checkbox"/> | Oedema        | Yes <input type="checkbox"/> | No <input type="checkbox"/> |
| Telangiectasia    | Yes <input type="checkbox"/> | No <input type="checkbox"/> |               |                              |                             |

Comments

Figure A2: Questionnaire sent to centres



### Views on long term follow-up data collection for breast cancer clinical trials

This questionnaire is to be completed by any person responsible for completing follow-up forms at your hospital. Please answer all questions in relation to your experiences of academic-led breast cancer clinical trials on the NIHR portfolio only

All responses you provide are treated confidentially and any results presented will not identify you



Please return all completed questionnaires to Lucy Kilburn, ICR Clinical Trials & Statistics Unit (ICR-CTSU), The Institute of Cancer Research, Sir Richard Doll Building, Cotswold Road, Sutton, Surrey. SM2 5NG or fax 0208 770 7876

**Definition of “follow-up”:** for the purpose of this questionnaire “follow-up” is defined as visits/contact subsequent to completion of surgery/radiotherapy/chemotherapy treatment

**Section 1: General details**

Name of your NHS Trust

Name of your hospital

**1.1 What is your role in breast cancer trials at your hospital? (Please tick one)**

|                                                                                |                          |                                         |                                                                     |
|--------------------------------------------------------------------------------|--------------------------|-----------------------------------------|---------------------------------------------------------------------|
| Research Nurse                                                                 | <input type="checkbox"/> | Consultant Medical/ Clinical Oncologist | <input type="checkbox"/>                                            |
| Data Manager                                                                   | <input type="checkbox"/> | Consultant Surgeon                      | <input type="checkbox"/>                                            |
| Clinical Trial Assistant                                                       | <input type="checkbox"/> | Specialist Registrar                    | <input type="checkbox"/>                                            |
| Clinical Trial Officer/Clinical Trial Practitioner/Clinical Research Associate | <input type="checkbox"/> | Other (specify)                         | <input type="checkbox"/> <input style="width: 100px;" type="text"/> |

**1.2 Which of the following NIHR portfolio academic-led breast cancer trials is your hospital participating in? (Please tick all that apply)**

|                 |                          |                                           |                          |          |                          |             |                          |            |                          |
|-----------------|--------------------------|-------------------------------------------|--------------------------|----------|--------------------------|-------------|--------------------------|------------|--------------------------|
| ABC             | <input type="checkbox"/> | ALTO                                      | <input type="checkbox"/> | ARTEMIS  | <input type="checkbox"/> | ATTOM       | <input type="checkbox"/> | AZURE      | <input type="checkbox"/> |
| BEATRICE        | <input type="checkbox"/> | COMICE                                    | <input type="checkbox"/> | DEVA     | <input type="checkbox"/> | EORTC10981  | <input type="checkbox"/> | ESTEEM     | <input type="checkbox"/> |
| FAST            | <input type="checkbox"/> | HERA                                      | <input type="checkbox"/> | HRT      | <input type="checkbox"/> | IMPORT HIGH | <input type="checkbox"/> | IMPORT LOW | <input type="checkbox"/> |
| LATTE           | <input type="checkbox"/> | NEAT                                      | <input type="checkbox"/> | NEO CENT | <input type="checkbox"/> | NEO EXCEL   | <input type="checkbox"/> | NEO TANGO  | <input type="checkbox"/> |
| PERSEPHONE      | <input type="checkbox"/> | POETIC                                    | <input type="checkbox"/> | PRIME    | <input type="checkbox"/> | PRIME II    | <input type="checkbox"/> | REACT      | <input type="checkbox"/> |
| SECRAB          | <input type="checkbox"/> | SOFT                                      | <input type="checkbox"/> | START    | <input type="checkbox"/> | SUPREMO     | <input type="checkbox"/> | TACT       | <input type="checkbox"/> |
| TACT2           | <input type="checkbox"/> | TANGO                                     | <input type="checkbox"/> | TEAM     | <input type="checkbox"/> | TEXT        | <input type="checkbox"/> |            |                          |
| Other (Specify) | <input type="checkbox"/> | <input style="width: 100%;" type="text"/> |                          |          |                          |             |                          |            |                          |

### Section 2: General questions about collection of follow-up

2.1 What is the total number of patients who are in the NIHR portfolio trials you have ticked in question 1.2 for whom you are personally responsible for providing follow-up data  
(approximately if you do not know exact figure)

2.2 On average how much time each week do you spend completing follow up case report forms for the breast cancer trials listed in question 1.2 conducted in your hospital?

< 2 hours       2 to 3 hours       4 to 7 hours       More than 7 hours

### Section 3: Questions about follow-up in "routine" practice at your hospital

3.1 How often in "routine" practice are breast cancer patients seen in follow-up clinics after the end of adjuvant treatment (surgery/radiotherapy/chemotherapy)?

|                | In the first year        | In the second year       | In the third year        | In the fourth year       | In the fifth year        | In subsequent years      |
|----------------|--------------------------|--------------------------|--------------------------|--------------------------|--------------------------|--------------------------|
| Every 3 months | <input type="checkbox"/> | <input type="checkbox"/> | <input type="checkbox"/> | <input type="checkbox"/> | <input type="checkbox"/> | <input type="checkbox"/> |
| Every 6 months | <input type="checkbox"/> | <input type="checkbox"/> | <input type="checkbox"/> | <input type="checkbox"/> | <input type="checkbox"/> | <input type="checkbox"/> |
| Annually       | <input type="checkbox"/> | <input type="checkbox"/> | <input type="checkbox"/> | <input type="checkbox"/> | <input type="checkbox"/> | <input type="checkbox"/> |
| Not seen       | <input type="checkbox"/> | <input type="checkbox"/> | <input type="checkbox"/> | <input type="checkbox"/> | <input type="checkbox"/> | <input type="checkbox"/> |

Other (specify)

3.2 At what point do you discharge patients from follow-up in "routine" practice?

< 3 years after diagnosis       3-5 years after diagnosis       >5 years after diagnosis       Not discharged

3.3 What investigations are done at each of these visits in "routine" practice?

|                      | Yes, all patients at all visits | Yes, all patients at some visits | Yes, some patients at all visits | Yes, some patients at some visits | No                       |
|----------------------|---------------------------------|----------------------------------|----------------------------------|-----------------------------------|--------------------------|
| clinical examination | <input type="checkbox"/>        | <input type="checkbox"/>         | <input type="checkbox"/>         | <input type="checkbox"/>          | <input type="checkbox"/> |
| mammogram            | <input type="checkbox"/>        | <input type="checkbox"/>         | <input type="checkbox"/>         | <input type="checkbox"/>          | <input type="checkbox"/> |
| blood test           | <input type="checkbox"/>        | <input type="checkbox"/>         | <input type="checkbox"/>         | <input type="checkbox"/>          | <input type="checkbox"/> |
| chest X-ray          | <input type="checkbox"/>        | <input type="checkbox"/>         | <input type="checkbox"/>         | <input type="checkbox"/>          | <input type="checkbox"/> |
| ECG                  | <input type="checkbox"/>        | <input type="checkbox"/>         | <input type="checkbox"/>         | <input type="checkbox"/>          | <input type="checkbox"/> |

3.4 Do the answers to question 3.1, 3.2 and 3.3 differ according to biology (e.g. ER status), prognosis etc?

Yes, according to biology (specify)

Yes, according to prognosis (specify)

Yes, according to another factor (specify)

No, all patients are treated the same

**Section 4: Questions about follow-up practice for patients in breast cancer trials at your hospital**

4.1 Which NIHR portfolio trials listed in question 1.2 require you to organise visits in addition to your “routine” practice? *(Please specify name of trial, how many additional visits and when they occur)*

4.2 Which NIHR portfolio trials listed in question 1.2 require you not to discharge patients?

4.3 Which NIHR portfolio trials listed in question 1.2 require you to organise investigations in addition to your “routine” practice? *(Please specify name of trial, how many additional investigations, which investigations and when they occur)*

4.4 Does your hospital run follow-up clinics specifically for trial patients?

Yes  → Go to Question 4.5

No  → Go to Question 4.7

4.5 If “Yes”, are they:

|                                           | Nurse-led?               | Consultant-led?          |
|-------------------------------------------|--------------------------|--------------------------|
| General cancer follow-up clinics?         | <input type="checkbox"/> | <input type="checkbox"/> |
| Breast cancer specific follow-up clinics? | <input type="checkbox"/> | <input type="checkbox"/> |

4.6 If “Yes”, how often are they held?

Weekly

Monthly

6 Monthly

Go to Question 4.9

Other (specify)



4.7 If "No" has your hospital considered setting up a follow-up clinic for breast cancer trial patients?

Yes  → Go to Question 4.8

No  → Go to Question 4.9

4.8 If "Yes", why did you decide not to set one up? (tick all that apply)

Lack of physical space

Lack of time in outpatient clinic timetable

Lack of time in nurse/consultant timetable

Other (specify)

4.9 How do you prioritise follow-up requests coming from different Trial Units?

Complete forms for each request as it arrives

Complete forms for several trials together in batches

Other system (specify)

4.10 Do you have a flagging system to identify for which breast cancer trial patients follow-up data is due?

Yes, we proactively follow-up patients before requests are sent from trials units

No, we wait for the trials unit to send out a request

Other method

Please describe your method for flagging these patients

### Section 5: Specific questions about collection of follow-up

5.1 How do you obtain follow-up information requested by Trial Units in trial patients before and after the patient is discharged? (tick all that apply)

|                                                  | Before patient is discharged | After patient is discharged |
|--------------------------------------------------|------------------------------|-----------------------------|
| The patient's medical record (paper copy)        | <input type="checkbox"/>     | <input type="checkbox"/>    |
| The electronic Hospital Information System (HIS) | <input type="checkbox"/>     | <input type="checkbox"/>    |
| Picture Archiving Computer System (PACS)         | <input type="checkbox"/>     | <input type="checkbox"/>    |
| Electronic Prescription Service (EPS)            | <input type="checkbox"/>     | <input type="checkbox"/>    |
| Request patient in for visit                     | <input type="checkbox"/>     | <input type="checkbox"/>    |
| Contact patient's GP                             | <input type="checkbox"/>     | <input type="checkbox"/>    |
| Contact the patient                              | <input type="checkbox"/>     | <input type="checkbox"/>    |

Other (specify)

**5.2 Which of the following items are available on the electronic patient record system your hospital uses?**  
*(tick all that apply)*

- |                  |                          |                            |                          |
|------------------|--------------------------|----------------------------|--------------------------|
| SNOMED CT coding | <input type="checkbox"/> | Dates of second malignancy | <input type="checkbox"/> |
| ICD10 coding     | <input type="checkbox"/> | Sites of relapse           | <input type="checkbox"/> |
| OPCS4 coding     | <input type="checkbox"/> | Date of death              | <input type="checkbox"/> |
| Prescriptions    | <input type="checkbox"/> | Cause of death             | <input type="checkbox"/> |
| Dates of relapse | <input type="checkbox"/> | Hospitalisation details    | <input type="checkbox"/> |

Toxicity *(specify)*

Other *(specify)*

**5.3 Do the patient records you use to annotate follow-up data contain information about late adverse events e.g. fractures/cardiovascular problems?**

Yes  No

*If "Yes", please provide details*

**5.4 How easy is it to obtain death certificates from hospital notes or electronic information systems?**

Very easy  Fairly easy  Possible, but difficult  Impossible

*Describe any difficulties (overleaf if necessary)*

**5.5 How easy is it to obtain pathology/radiology reports/scans for relapse/second malignancies from hospital notes or electronic information systems?**

Very easy  Fairly easy  Possible, but difficult  Impossible

*Describe any difficulties (overleaf if necessary)*

**Section 6: Opinions on follow-up in breast cancer clinical trials**

**Your opinion and thoughts on how Trial Units currently conduct long term follow up are important and may help us to refine the process for future breast cancer trials.**

**6.1 In your opinion, what are the difficulties affecting your hospital's ability to provide long term follow-up data?**

**6.2 Electronic follow-up collection is a possible way forward. In your opinion, which of the issues (e.g. firewalls, password issues, training of staff) are likely to be most problematic?**

**6.3 Please use this space to comment on long term follow up for breast cancer patients in trials, and what problems if any, (e.g. cost of postage) it presents to your hospital.**

**6.4 What solutions would help to reduce the resource burden for your hospital?**

**Please return completed questionnaire to Lucy Kilburn, ICR Clinical Trials & Statistics Unit (ICR-CTSU), The Institute of Cancer Research, Sir Richard Doll Building, Cotswold Road, Sutton, Surrey. SM2 5NG or fax 0208 770 7876.**

**Thank you for completing this questionnaire**

Figure. A3a

Patient identifiers and tracing patients in the long term

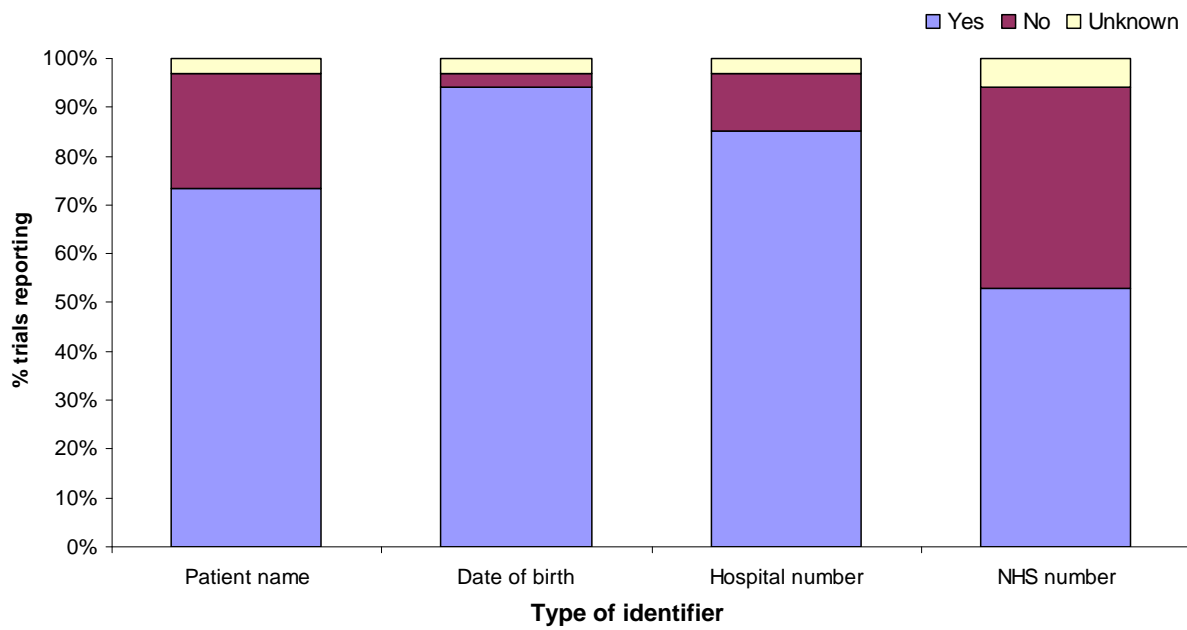

Figure A3a: key patient identifiers and percentage of national trials collecting each type.

Figure A3b.

Collection of NHS number.

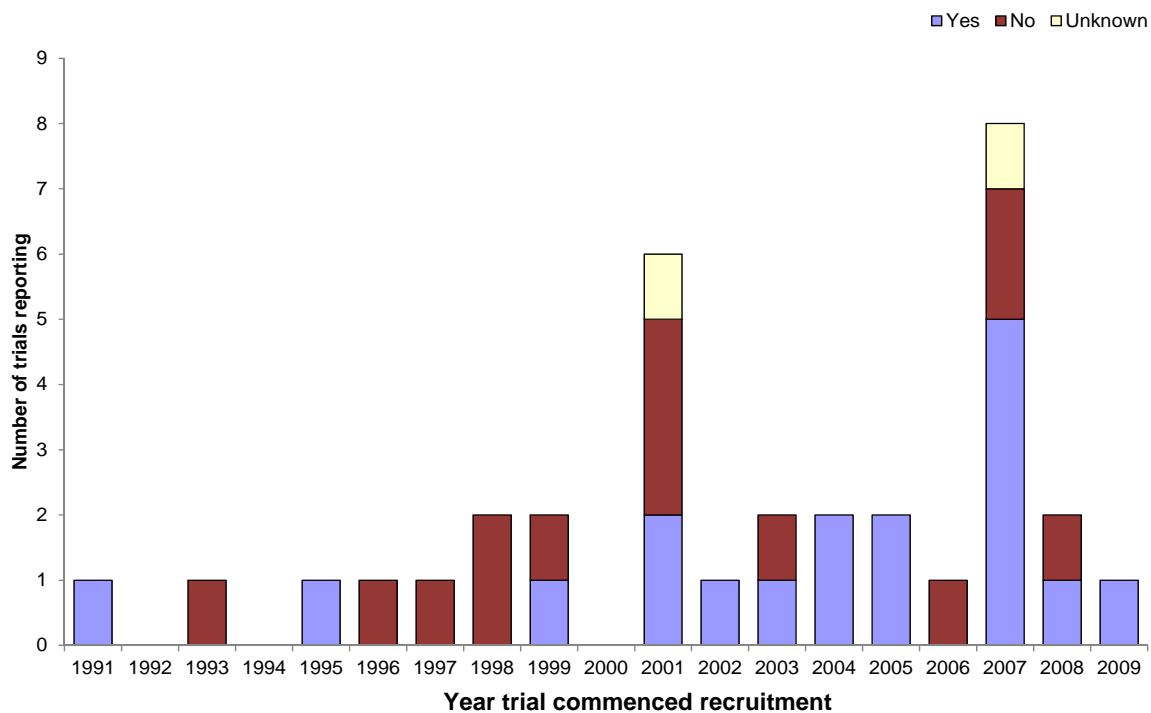

Figure A3b: Collection of NHS number in relation to year the trial opened for recruitment

Figure A4a - Frequency of long term follow-up by type of trial.

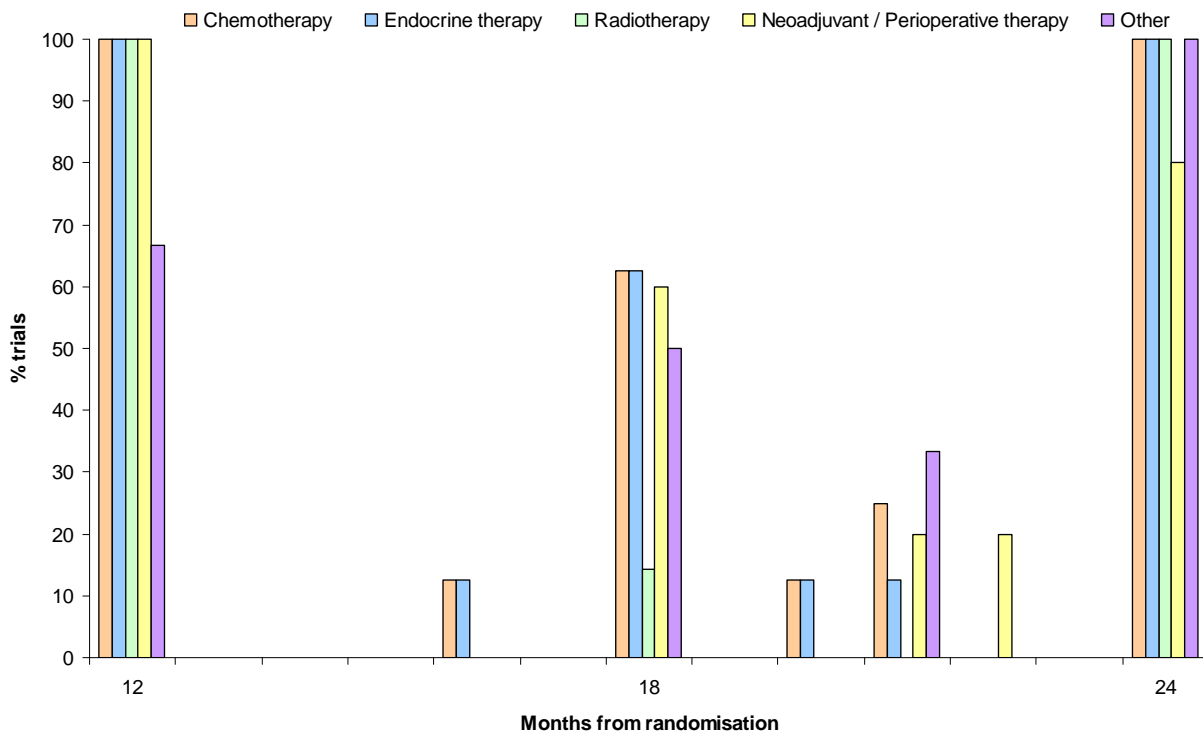

Figure A4a: Frequency of long term follow-up by type of trial - 1-2 years post randomisation

Figure A4b - Frequency of long term follow-up by type of trial

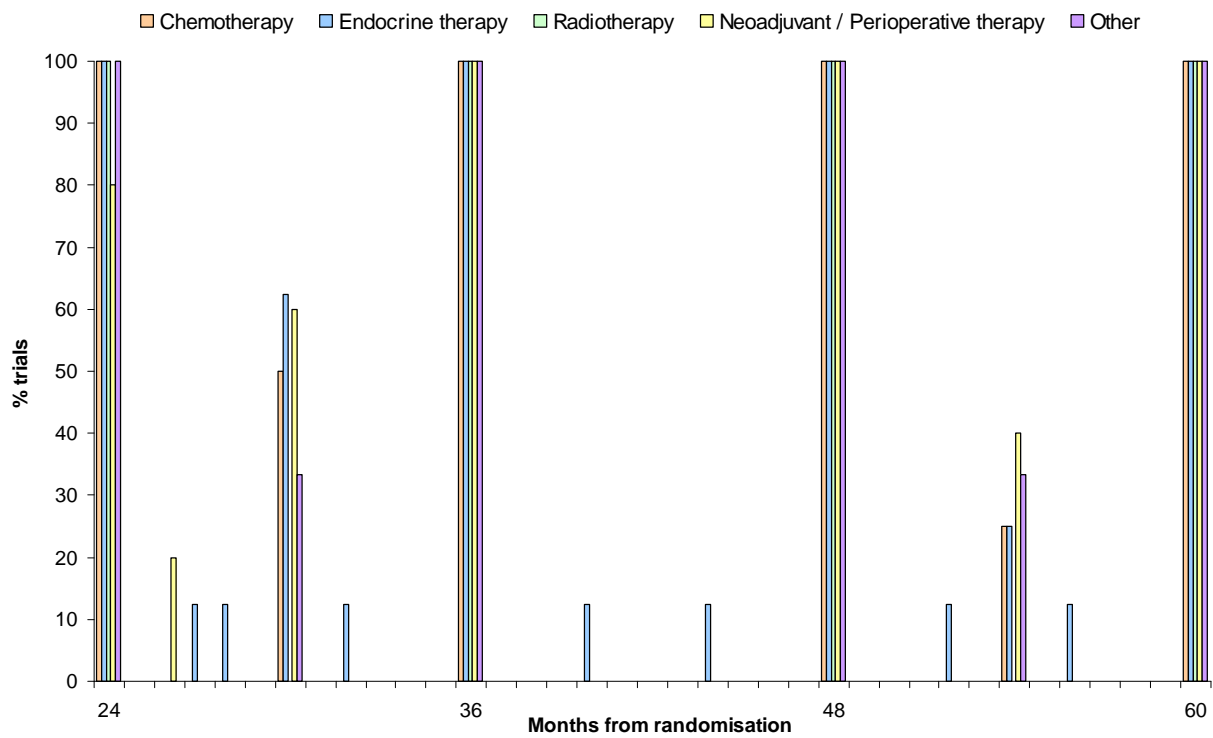

Figure A4b: Frequency of long term follow-up by type of trial - 2-5 years post randomisation

Figure A4c - Frequency of long term follow-up by type of trial.

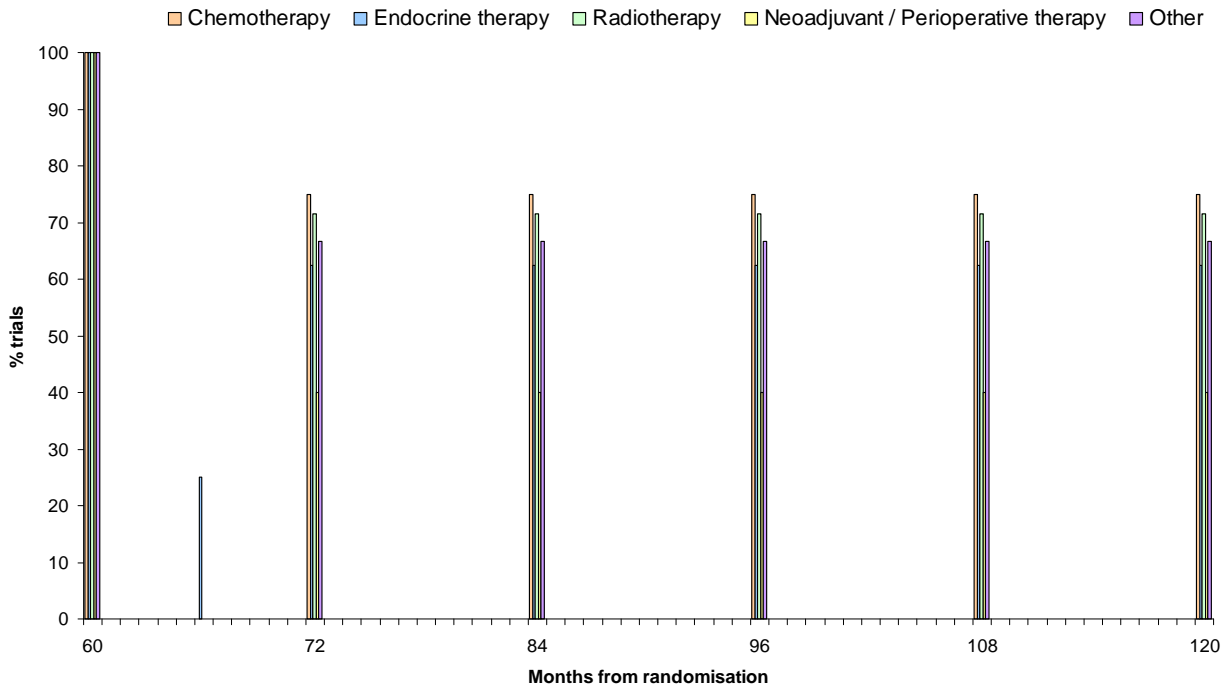

Figure A4c: Frequency of long term follow-up by type of trial - **5-10 years post randomisation.**
